# Supplementary material for: Morphological suitability for endovascular repair, non-intervention rates, and operative mortality in women and men assessed for intact abdominal aortic aneurysm repair: systematic reviews with meta-analysis
Source: PubMed Central journal article supplement — Lancet. 2017 Jun 24;389(10088):2482–91. doi: 10.1016/S0140-6736(17)30639-6 (PMC5483509; doi:10.1016/s0140-6736(17)30639-6), 2017-06-24
Supplement: mmc1.pdf [file mmc1.pdf]

# THE LANCET

## Supplementary appendix

This appendix formed part of the original submission and has been peer reviewed. We post it as supplied by the authors.

Supplement to: Ulug P, Sweeting MJ, von Allmen RS, Thompson SG, Powell JT on behalf of the SWAN collaborators. Morphological suitability for endovascular repair, non-intervention rates, and operative mortality in women and men assessed for intact abdominal aortic aneurysm repair: systematic reviews with meta-analysis. *Lancet* 2017; published online April 25. [http://dx.doi.org/10.1016/S0140-6736\(17\)30639-6](http://dx.doi.org/10.1016/S0140-6736(17)30639-6).

**Women assessed for intact abdominal aortic aneurysm repair fare worse than men: systematic reviews of morphological suitability for endovascular repair, non-intervention rates and 30-day operative mortality**

Supplementary information

## Table of Contents

|                                                                                                                                 |    |
|---------------------------------------------------------------------------------------------------------------------------------|----|
| SEARCH STRATEGY: EVAR SUITABILITY REVIEW.....                                                                                   | 2  |
| SEARCH STRATEGY: NON-INTERVENTION REVIEW SEARCH STRATEGY .....                                                                  | 4  |
| SEARCH STRATEGY: 30-DAY OPERATIVE MORTALITY REVIEW.....                                                                         | 5  |
| <br>                                                                                                                            |    |
| FIGURE S 1 EVAR SUITABILITY REVIEW .....                                                                                        | 6  |
| FIGURE S 2 NON-INTERVENTION REVIEW.....                                                                                         | 7  |
| FIGURE S 3 30-DAY OPERATIVE MORTALITY REVIEW .....                                                                              | 8  |
| <br>                                                                                                                            |    |
| TABLE S 1 CHARACTERISTICS OF THE INCLUDED STUDIES IN EVAR SUITABILITY REVIEW.....                                               | 9  |
| TABLE S 2 CHARACTERISTICS OF THE INCLUDED STUDIES: NON-INTERVENTION RATES FOR ELECTIVE REPAIR REVIEW.....                       | 10 |
| TABLE S 3 CHARACTERISTICS OF THE INCLUDED STUDIES IN THE 30-DAY OPERATIVE MORTALITY REVIEW, ORDERED BY DATE OF AAA REPAIR ..... | 11 |

### Search Strategy: EVAR suitability review

|                                                                                                                                                                                                                                                                                                                                                                                                                                                         |
|---------------------------------------------------------------------------------------------------------------------------------------------------------------------------------------------------------------------------------------------------------------------------------------------------------------------------------------------------------------------------------------------------------------------------------------------------------|
| MESH.EXACT.EXPLODE("Endovascular Procedures") OR MESH.EXACT.EXPLODE("Stents") OR MESH.EXACT("Vascular Surgical Procedures") OR MESH.EXACT("Blood Vessel Prosthesis") OR MESH.EXACT("Blood Vessel Prosthesis Implantation") OR MESH.EXACT("Vascular Grafting")                                                                                                                                                                                           |
| EMB.EXACT("endovascular aneurysm repair") OR EMB.EXACT("aortic aneurysm endovascular graft") OR EMB.EXACT("endovascular surgery") OR EMB.EXACT.EXPLODE("stent") OR EMB.EXACT.EXPLODE("blood vessel graft") OR EMB.EXACT("endoprosthesis") OR EMB.EXACT.EXPLODE("vascular stent") OR EMB.EXACT("aneurysm surgery") OR EMB.EXACT("vascular surgery") OR EMB.EXACT.EXPLODE("blood vessel prosthesis") OR EMB.EXACT.EXPLODE("blood vessel transplantation") |
| ti,ab(endovascular or endostent[*4] or stent[*4] or evar or fevar or pevar or endoprosthe[*4] or endograft[*4] or graft[*4])                                                                                                                                                                                                                                                                                                                            |
| incraft or palmaz or zenith or dynalink or hemobahn or luminex* or memotherm or wallstent or viabahn or nitinol or intracoil or tantalum or powerlink or talent or excluder or aorfix or endologix or anaconda or triascular or cordis or endurant or quantum or aneurx or ancure or ankura or "e vita" or "e xl" or "endomed endofit" or fortron or hercules or lifepath or ovation or treovance or ventana or nellix                                  |
| MESH.EXACT("Aortic Aneurysm, Abdominal")                                                                                                                                                                                                                                                                                                                                                                                                                |
| EMB.EXACT("abdominal aorta aneurysm")                                                                                                                                                                                                                                                                                                                                                                                                                   |
| ti,ab(abdom[*6] near/5 aort[*2] near/5 (aneurysm[*1] or aneurism[*1]))                                                                                                                                                                                                                                                                                                                                                                                  |
| ti,ab(aaa or aaas or iaaa or iaaas)                                                                                                                                                                                                                                                                                                                                                                                                                     |
| ti,ab(abdom[*6] near/5 aort[*2] near/5 (balloon[*3] or dilat[*6] or bulg[*4] or expan[*6]))                                                                                                                                                                                                                                                                                                                                                             |
| MESH.EXACT("Female") OR MESH.EXACT.EXPLODE("Women") OR MESH.EXACT.EXPLODE("Women's Health")                                                                                                                                                                                                                                                                                                                                                             |
| EMB.EXACT.EXPLODE("female") OR EMB.EXACT("women's health")                                                                                                                                                                                                                                                                                                                                                                                              |
| ti,ab(female or females or woman or women)                                                                                                                                                                                                                                                                                                                                                                                                              |
| MESH.EXACT("Sex Factors") OR MESH.EXACT("Sex Distribution") OR MESH.EXACT("Sex Ratio") OR MESH.EXACT("Sex Characteristics")                                                                                                                                                                                                                                                                                                                             |
| EMB.EXACT("sex difference") OR EMB.EXACT("gender and sex") OR EMB.EXACT("gender") OR EMB.EXACT("sex ratio")                                                                                                                                                                                                                                                                                                                                             |
| ti,ab(gender or genders or sex)                                                                                                                                                                                                                                                                                                                                                                                                                         |
| MESH(ah) OR MESH(anatom[*6]) OR MESH(morpholog[*6]) OR MESH.EXACT("Iliac Artery") OR MESH(calcification)                                                                                                                                                                                                                                                                                                                                                |
| EMB(anatom[*6]) OR EMB(morpholog[*6]) OR EMB.EXACT.EXPLODE("pathological anatomy") OR EMB.EXACT("neck circumference") OR EMB.EXACT("artery diameter") OR EMB.EXACT("blood vessel diameter") OR EMB.EXACT.EXPLODE("iliac artery") OR EMB.EXACT("artery calcification") OR EMB.EXACT("calcification") OR EMB.EXACT("blood vessel calcification")                                                                                                          |

ti,ab(anatom[\*6] or morpholog[\*6] or diameter[\*1] or circumference[\*1] or size[\*1] or calcif[\*8] or angle[\*1] or angulat[4] or tortuous or tortuosit[\*3] or calibre[\*1] or calibre[\*1] or "access vessel[\*1]" or "iliac arter[\*3]" or "ileal arter[\*3]" or "ilial arter[\*3]" or aortoiliac or "aorto iliac")

ti,ab(neck[\*2] near/5 (aneurysm[\*2] or aneurism[\*2] or infrarenal or "infra renal" or aortic or proximal or short or shorten[\*2] or favourable or unfavourable or challenging or length[\*1] or shape[\*1] or hostile)) or ti,ab(funnel or conical)

ti,ab("instructions for use" or ifu or ifus)

**Limit : start 01.01.2005**

### Search Strategy: Non-intervention review search strategy

|                                                                                                                                                                                                                                                                                                                                      |
|--------------------------------------------------------------------------------------------------------------------------------------------------------------------------------------------------------------------------------------------------------------------------------------------------------------------------------------|
| MESH.EXACT.EXPLODE("Endovascular Procedures") OR MESH.EXACT.EXPLODE("Stents") OR MESH.EXACT("Vascular Surgical Procedures") OR MESH.EXACT("Blood Vessel Prosthesis") OR MESH.EXACT("Blood Vessel Prosthesis Implantation") OR MESH.EXACT("Vascular Grafting")                                                                        |
| EMB.EXACT.EXPLODE("blood vessel prosthesis") OR (EMB.EXACT("aorta graft") OR EMB.EXACT("blood vessel transplantation")) OR repair OR (endovascular surgery) OR (EMB.EXACT("endovascular aneurysm repair") OR EMB.EXACT.EXPLODE("aortic aneurysm endovascular graft") OR EMB.EXACT.EXPLODE("endovascular surgery")) OR (open surgery) |
| MESH.EXACT("Aortic Aneurysm, Abdominal")                                                                                                                                                                                                                                                                                             |
| EMB.EXACT("abdominal aorta aneurysm")                                                                                                                                                                                                                                                                                                |
| ti,ab(abdom[*6] near/5 aort[*2] near/5 (aneurysm[*1] or aneurism[*1]))                                                                                                                                                                                                                                                               |
| ti,ab(aaa or aaas or iaas or iaas)                                                                                                                                                                                                                                                                                                   |
| ti,ab(abdom[*6] near/5 aort[*2] near/5 (balloon[*3] or dilat[*6] or bulg[*4] or expan[*6]))                                                                                                                                                                                                                                          |
| MESH.EXACT("Female") OR MESH.EXACT.EXPLODE("Women") OR MESH.EXACT.EXPLODE("Women's Health")                                                                                                                                                                                                                                          |
| EMB.EXACT.EXPLODE("female") OR EMB.EXACT("women's health")                                                                                                                                                                                                                                                                           |
| ti,ab(female or females or woman or women)                                                                                                                                                                                                                                                                                           |
| MESH.EXACT("Sex Factors") OR MESH.EXACT("Sex Distribution") OR MESH.EXACT("Sex Ratio") OR MESH.EXACT("Sex Characteristics")                                                                                                                                                                                                          |
| EMB.EXACT("sex difference") OR EMB.EXACT("gender and sex") OR EMB.EXACT("gender") OR EMB.EXACT("sex ratio")                                                                                                                                                                                                                          |
| ti,ab(gender or genders or sex)                                                                                                                                                                                                                                                                                                      |
| (treatment refusal) OR (MESH.EXACT("Refusal to Treat")) OR (MESH.EXACT("Patient Selection"))                                                                                                                                                                                                                                         |
| COMORBIDITY AND MESH.EXACT("Comorbidity") OR (MESH.EXACT("Risk Factors")) AND (MESH.EXACT("Risk Assessment"))                                                                                                                                                                                                                        |
| (MESH.EXACT("Elective Surgical Procedures")) or ti,ab("elective")                                                                                                                                                                                                                                                                    |
| (ti,ab("treatment refusal" or "undergo treatment")) OR (MESH.EXACT("Refusal to Treat")) OR (MESH.EXACT("Patient Selection")) OR ("turn down" or "turndown") OR (MESH.EXACT("Palliative Care")) OR palliat[*3] OR (ti,ab("nonoperated" or "non-operated"))                                                                            |

Limit : start 01.01.2005

### Search Strategy: 30-day operative mortality review

|                                                                                                                                                                                                                                                                                                                                                                                             |
|---------------------------------------------------------------------------------------------------------------------------------------------------------------------------------------------------------------------------------------------------------------------------------------------------------------------------------------------------------------------------------------------|
| MESH.EXACT.EXPLODE("Aortic Aneurysm, Abdominal") OR (abdominal aort*) AND aneurysm*                                                                                                                                                                                                                                                                                                         |
| MESH.EXACT("Blood Vessel Prosthesis") OR MESH.EXACT("Blood Vessel Prosthesis Implantation") OR MESH.EXACT("Vascular Grafting") OR repair OR (endovascular surgery) OR (open surgery) OR MESH.EXACT("Aortic Aneurysm, Abdominal -- surgery")                                                                                                                                                 |
| MESH.EXACT("Aortic Aneurysm, Abdominal -- mortality") OR MESH.EXACT("Aortic Aneurysm, Abdominal -- complications") OR MESH.EXACT("Hospital Mortality") OR MESH.EXACT("Minimally Invasive Surgical Procedures -- mortality") OR MESH.EXACT("Vascular Surgical Procedures -- mortality") OR MESH.EXACT.EXPLODE("Vascular Surgical Procedures : E.04.100.814 -- adverse effects") OR mortality |
| MESH.EXACT.EXPLODE("Treatment Outcome")                                                                                                                                                                                                                                                                                                                                                     |
| EMB.EXACT.EXPLODE("abdominal aorta aneurysm") OR (ti,ab(abdominal aort*) AND aneurysm)                                                                                                                                                                                                                                                                                                      |
| EMB.EXACT.EXPLODE("blood vessel prosthesis") OR (EMB.EXACT("aorta graft") OR EMB.EXACT("blood vessel transplantation")) OR repair OR (endovascular surgery) OR (EMB.EXACT("endovascular aneurysm repair") OR EMB.EXACT.EXPLODE("aortic aneurysm endovascular graft") OR EMB.EXACT.EXPLODE("endovascular surgery")) OR (open surgery)                                                        |
| ti,ab(female or females or woman or women)                                                                                                                                                                                                                                                                                                                                                  |
| MESH.EXACT("Sex Factors") OR MESH.EXACT("Sex Distribution") OR MESH.EXACT("Sex Ratio") OR MESH.EXACT("Sex Characteristics")                                                                                                                                                                                                                                                                 |
| EMB.EXACT("sex difference") OR EMB.EXACT("gender and sex") OR EMB.EXACT("gender") OR EMB.EXACT("sex ratio")                                                                                                                                                                                                                                                                                 |
| ti,ab(gender or genders or sex)                                                                                                                                                                                                                                                                                                                                                             |
| (EMB.EXACT("cardiovascular mortality") OR EMB.EXACT.EXPLODE("surgical mortality")) OR EMB.EXACT.EXPLODE("mortality") OR mortality                                                                                                                                                                                                                                                           |
| EMB.EXACT("treatment outcome")                                                                                                                                                                                                                                                                                                                                                              |

Limit : start 01.01.2009

The protocols for these reviews were developed according to PRISMA-P guidelines (<http://www.prisma-statement.org/Extensions/Protocols.aspx>)

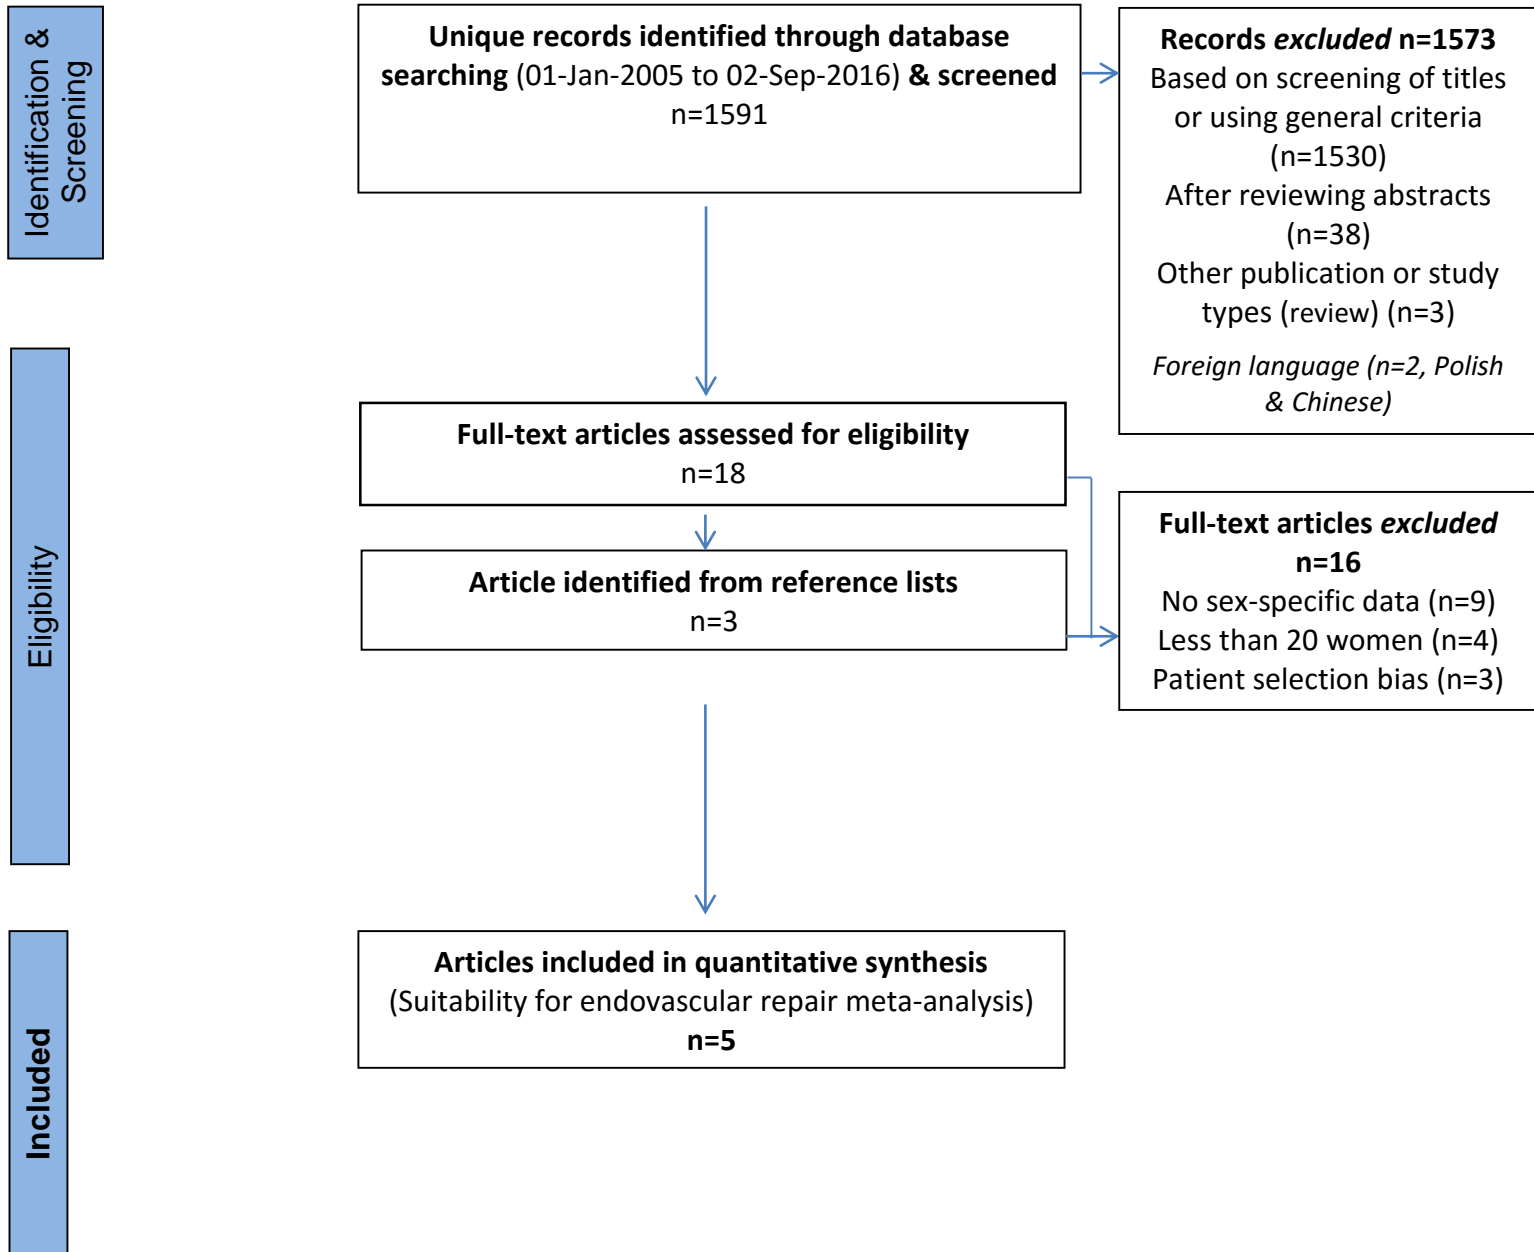

Figure S 1 EVAR suitability review

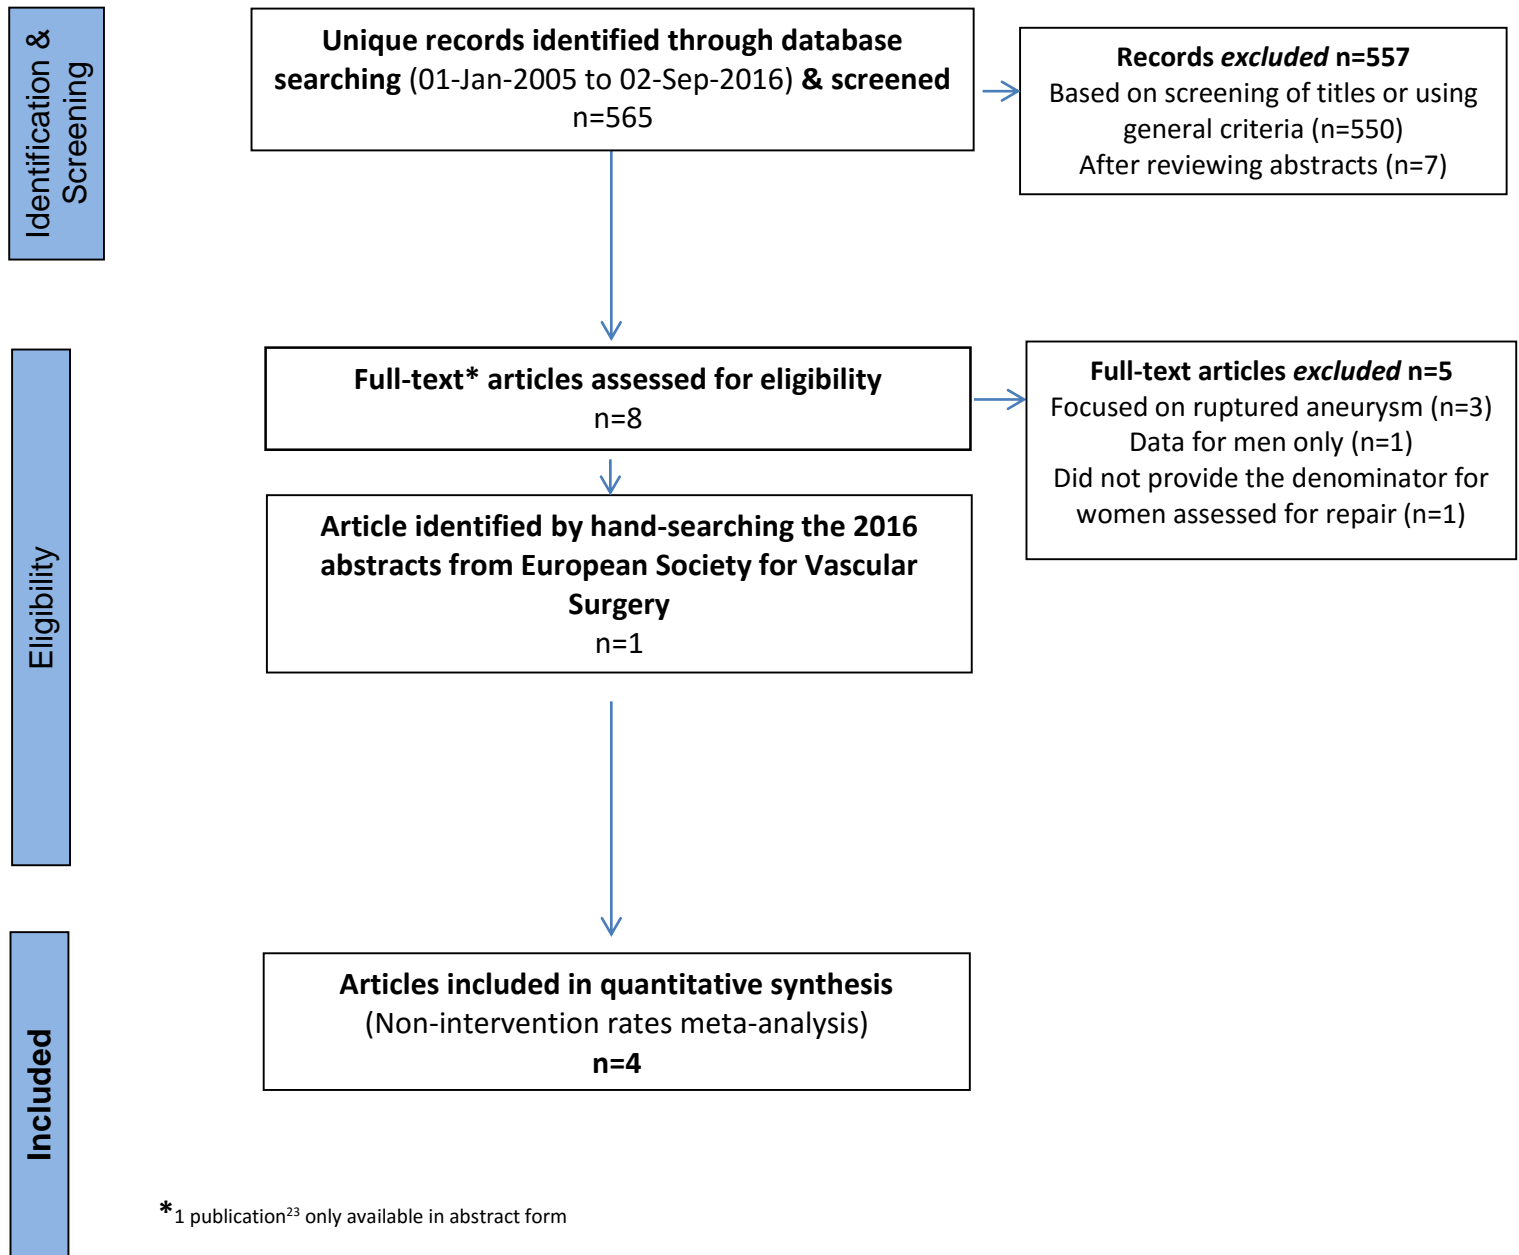

Figure S 2 Non-intervention review



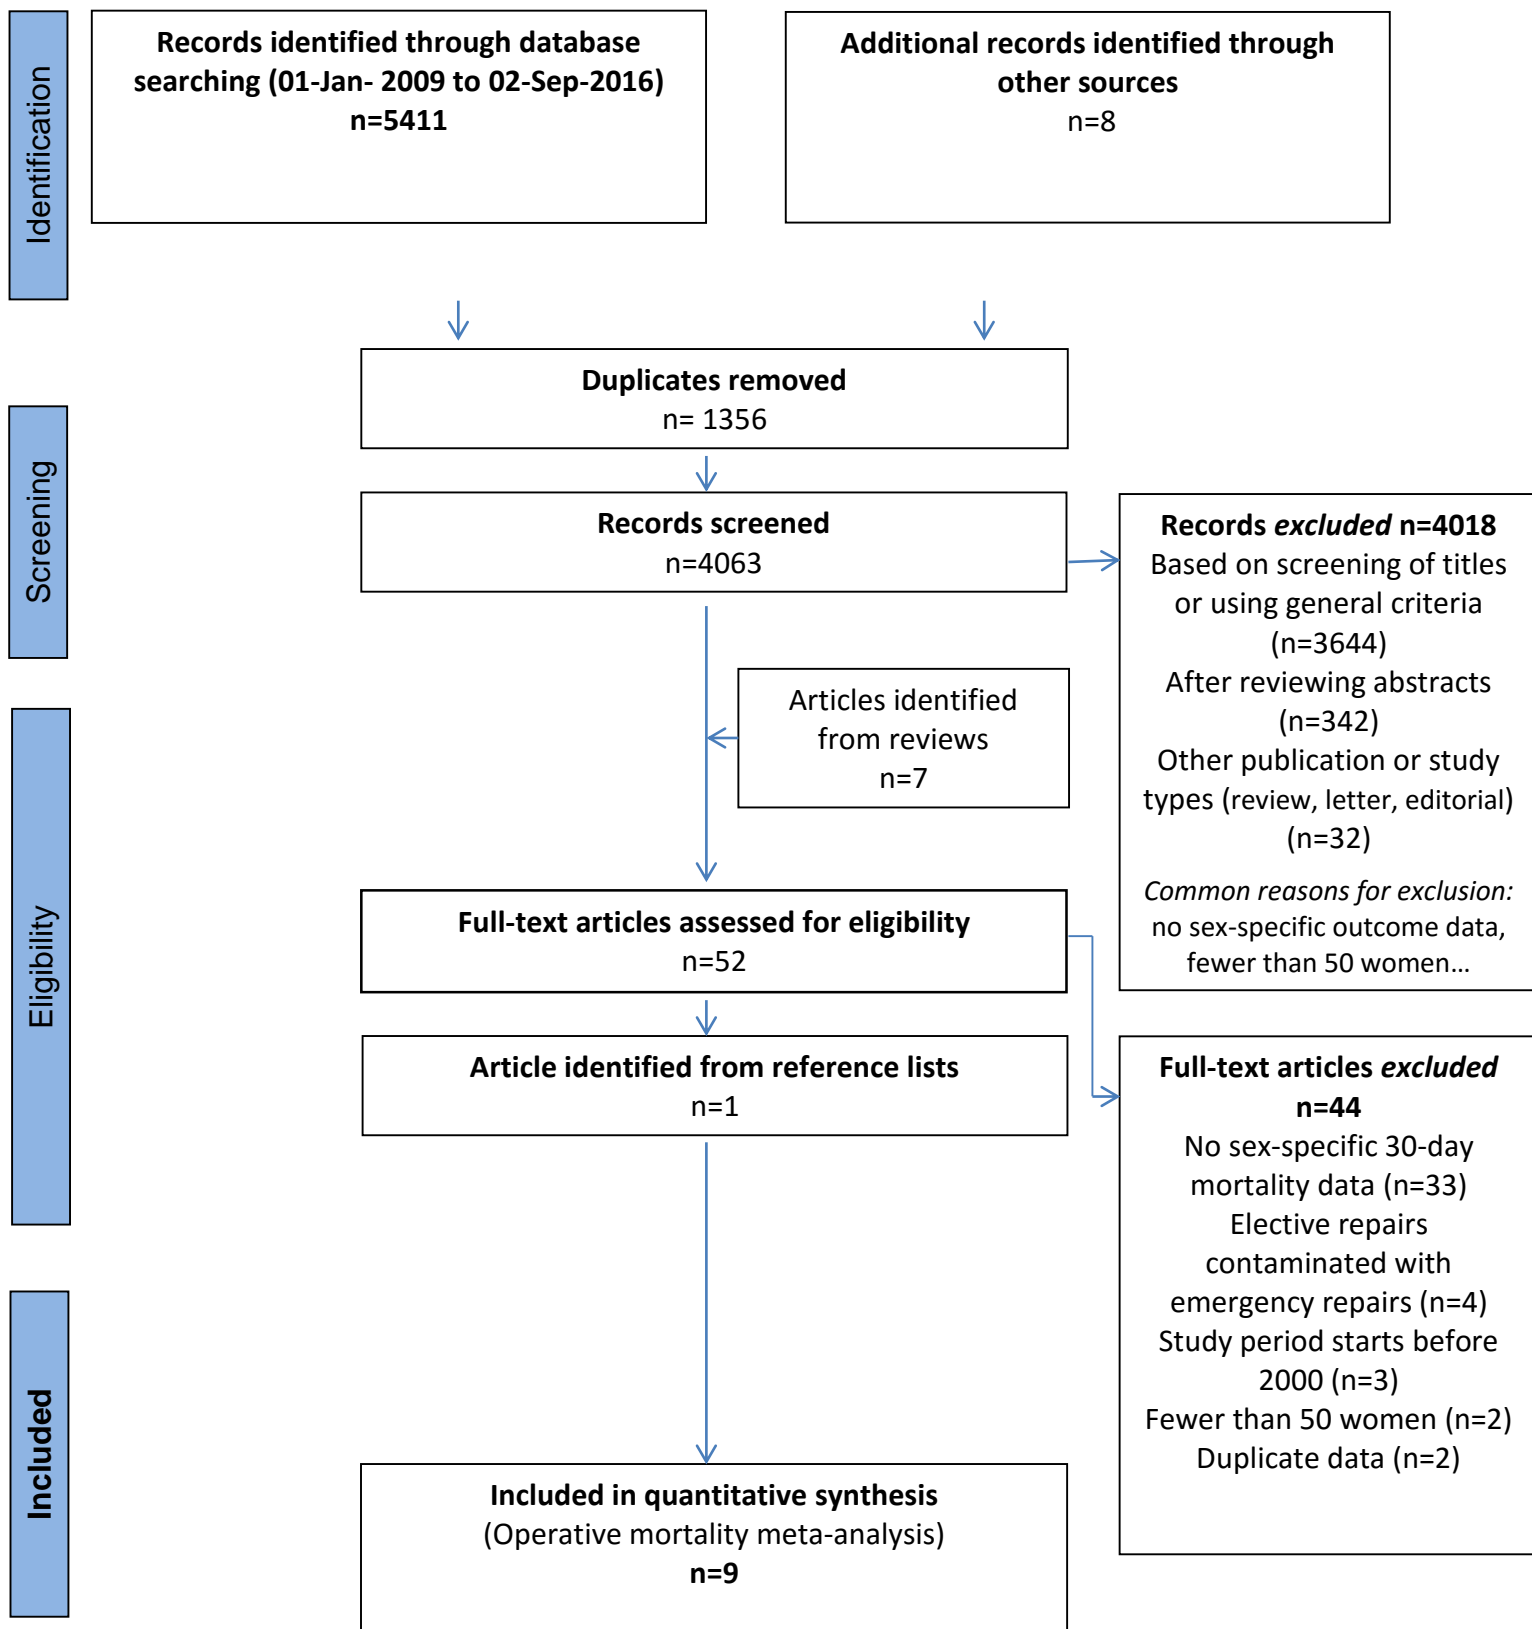

Figure S 3 30-day operative mortality review

**Table S 1** Characteristics of the included studies in EVAR suitability review

| Author (country)                          | Patient base                                     | Suitability criteria                                                                           | N-O* score | N         | Age (mean)     | Aneurysm morphology (mean) |                 |                  |                             |                                   | EVAR Suitable (%) |
|-------------------------------------------|--------------------------------------------------|------------------------------------------------------------------------------------------------|------------|-----------|----------------|----------------------------|-----------------|------------------|-----------------------------|-----------------------------------|-------------------|
|                                           |                                                  |                                                                                                |            |           |                | AAA diam. (mm)             | Neck diam. (mm) | Neck length (mm) | Neck angle (α) <sup>o</sup> | Iliac or access artery diam. (mm) |                   |
| Kristmundsson <sup>13</sup> (2014) Sweden | All AAAs with CT scans 2006-07                   | Within any IFU for Excluder, Endurant or Zenith Flex grafts ND 18-32 NL ≥ 10 NA ≤ 75 IAD ≥ 7.5 | 3          | 41 women  | na             | 58.6                       | 26.8            | 16.9             | 30.0                        | 6.4                               | 11/41 (27%)       |
|                                           |                                                  |                                                                                                |            | 200 men   | na             | 64.9                       | 27.0            | 22.8             | 46.3                        | 8.2                               | 108/200 (54%)     |
| Hultgren <sup>14</sup> (2013) Sweden      | All elective repairs in one clinic 2006-08       | ND ≤ 32 NL ≥ 15 NA ≤ 60 7.5 ≤ IAD ≤ 20                                                         | 5          | 32 women  | 72             | 56                         | -               | -                | -                           | -                                 | 15/32 (47%)       |
|                                           |                                                  |                                                                                                |            | 140 men   | 72             | 65                         | -               | -                | -                           | -                                 | 80/140 (57%)      |
| Sweet <sup>15</sup> (2011) USA            | All AAAs > 4.0 cm with CT scans 1997-2009        | 18 ≤ ND ≤ 32 NL ≥ 15 NA < 60                                                                   | 5          | 251 women | 77             | 58                         | 24              | 15               | 28                          | 5.6                               | 63/251 (25%)      |
|                                           |                                                  |                                                                                                |            | 812 men   | 74             | 59                         | 25              | 19               | 20                          | 7.0                               | 374/812 (46%)     |
| Park <sup>16</sup> (2011) Korea           | All AAAs > 4.0 cm with CT scan between 2003-2010 | Within any IFU for AneuRx, Excluder, Talent, or Zenith grafts ND ≤ 32 NL ≥ 10 NA ≤ 60 IAD ≥ 8  | 4          | 35 women  | 73 men & women | -                          | -               | -                | -                           | -                                 | 15/35 (43%)       |
|                                           |                                                  |                                                                                                |            | 156 men   |                | -                          | -               | -                | -                           | -                                 | 74/156 (47%)      |
| Moise <sup>17</sup> (2006) USA            | Patients evaluated for EVAR between 2000-2003    | ND ≤ 29 NL ≥ 15 NA ≤ 60 IAD ≥ 7                                                                | 4          | 41 women  | na             | -                          | -               | -                | -                           | -                                 | 15/41 (37%)       |
|                                           |                                                  |                                                                                                |            | 199 men   | na             | -                          | -               | -                | -                           | -                                 | 128/199 (64%)     |

\*N-O=Newcastle Ottawa score, assesses selection, comparability and outcomes, with a maximum score of 10 points. AAA, abdominal aortic aneurysm, IFU, Instructions For Use, ND proximal neck diameter (mm), NL proximal neck length (mm), NA, proximal neck angle (°), IAD internal iliac diameter (mm).

**Table S 2** Characteristics of the included studies: non-intervention rates for elective repair review

| <b>Author &amp; period</b>                                    | <b>N-O# score n/8</b> | <b>Age information</b>  | <b>Non-intervention rate for men (%)</b> | <b>Non-intervention rate for women (%)</b> |
|---------------------------------------------------------------|-----------------------|-------------------------|------------------------------------------|--------------------------------------------|
| <b>Whittaker<sup>24</sup></b><br>Jan 2013 to Dec 2015         | 5                     | N/A                     | 83/389 (21%)                             | 24/65 (37%)                                |
| <b>Scott<sup>21</sup></b><br>Jan 2006 to Apr 2012             | 5                     | median overall 73 years | 123/516 (24%)                            | 15/59 (25%)                                |
| <b>Gorst<sup>23</sup></b><br>July 2007 to May 2011            | 5                     | mean overall 82 years   | 58/254 (23%)                             | 29/78 (37%)                                |
| <b>Karthikesalingham<sup>22</sup></b><br>Jan 2008 to Dec 2009 | 5                     | mean overall 75 years   | 16/206 (8%)                              | 16/45 (41%)                                |

#N-O Newcastle Ottawa score for selection and outcome, with a maximum score of 8  
All studies were from the UK, Reference 22 is the only one from a specialist tertiary referral centre.

**Table S 3** Characteristics of the included studies in the 30-day operative mortality review, ordered by date of AAA repair

| Author (country)                                | Repair date(s)      | Derivation of cohort         | Intervention E, EVAR OR, open repair | N-O score n/10 | N= w, women m, men | Mean age (y)     | 30-day mortality EVAR (%) | 30-day mortality open repair (%) |
|-------------------------------------------------|---------------------|------------------------------|--------------------------------------|----------------|--------------------|------------------|---------------------------|----------------------------------|
| Lowry <sup>32</sup><br>UK                       | Apr 2006 – Mar 2015 | Hospital Episode Statistics  | E                                    | 7              | 2304               | 78 <sup>^</sup>  | 57/2304 (2.5)             | n/a                              |
|                                                 |                     |                              |                                      |                | 18215              | 76 <sup>^</sup>  | 283/18215 (1.6)           |                                  |
| Nevidomskye <sup>25</sup><br>USA                | Jul 2010 - Sep 2013 | Statewide registry VI-SCOAP  | E, OR                                | 6              | 216w               | 73.1             | 5/160 (3.1)               | 5/56 (8.9)                       |
|                                                 |                     |                              |                                      |                | 848m               | 73.0             | 4/696 (0.6)               | 4/152 (2.6)                      |
| Chung <sup>31</sup><br>USA                      | Jun 2003 - Jul 2012 | Single centre                | E                                    | 5              | 121w               | n/a <sup>~</sup> | 2/121 (1.7)               | n/a                              |
|                                                 |                     |                              |                                      |                | 617m               |                  | 11/617 (1.8)              |                                  |
| Lo <sup>27</sup><br>USA                         | 2003 - 2011         | VSGNE                        | E, OR                                | 7              | 820w               | 75 <sup>^</sup>  | 5/408 (1.2)               | 15/412 (3.6)                     |
|                                                 |                     |                              |                                      |                | 2777m              | 72 <sup>^</sup>  | 15/1660 (0.9)             | 19/1117 (1.7)                    |
| Mani <sup>28</sup><br>Sweden                    | 2006 - 2010         | Swedvasc                     | E, OR                                | 9              | 765w               | n/a              | 10/329 (3)                | 17/436 (3.9)                     |
|                                                 |                     |                              |                                      |                | 3367m              |                  | 39/1669 (2.3)             | 23/1698 (1.4)                    |
| Ramanan <sup>26</sup><br>USA                    | 2007- 2009          | ACS NSQIP                    | OR                                   | 7              | 728w               | n/a              | n/a                       | 34/728 (4.7)                     |
|                                                 |                     |                              |                                      |                | 2117m              |                  |                           | 61/2117 (2.9)                    |
| Mehta <sup>29</sup><br>USA                      | 2002 - 2009         | Single centre                | E, OR                                | 7              | 553w               | n/a              | 11/344 (3.2)              | 12/209 (5.7)                     |
|                                                 |                     |                              |                                      |                | 1827m              |                  | 12/1248 (1.0)             | 27/579 (4.7)                     |
| Powell <sup>5</sup><br>5 <sup>#</sup> countries | 2000 - 2009         | EVAR 1, ACE DREAM, OVER RCTs | E, OR                                | 9              | 148w               | 75.2             | 1/77 (1.3)                | 5/71 (6.9)                       |
|                                                 |                     |                              |                                      |                | 2545m              | 71.3             | 15/1312 (1.1)             | 35/1233 (2.8)                    |
| Schmerhorn <sup>30</sup><br>USA                 | 2008 only           | Medicare                     | E, OR                                | 6              | 5421w              | n/a              | 77/3657 (2.1)             | 123/1764 (7.0)                   |
|                                                 |                     |                              |                                      |                | 19705m             |                  | 203/15590 (1.3)           | 214/4115 (5.2)                   |

**VI-SCOAP**= Washington state Vascular-Interventional Surgical Care and Outcomes Assessment Program; **ACS NSQIP**= American College of Surgeons National Surgical Quality Improvement Program; **VSGNE**=Vascular Study Group of New England; **Swedvasc**= Swedish National Quality Registry for Vascular Surgery; **Medicare**= national social insurance program; **RCTs**= Randomised controlled trials

<sup>1</sup> Reports asymptomatic intact AAA only; <sup>~</sup> Only provided for the whole cohort: Women: 77.8 (±7.6); Men: 74.7 (±8.3), no separate age data for the late era; # U.K., U.S.A, France, Netherlands/Belgium, patients operated from 2000 included in the current analysis only; <sup>^</sup> median.
